# Supplementary material for: A Novel, Integron-Regulated, Class C β-Lactamase
Source: MDPI journal article supplement (doi:10.3390/antibiotics9030123), 2020-03-14
Supplement: s1 [file s1]

## Supplement

**Table S1.** Frequencies of unique PacBio long reads (97 % identity threshold) that harbor novel *ampC* genes. Only reads containing ORFs with 100 % nucleotide identity and 100 % coverage to *bla*<sub>IDC-1</sub> or *bla*<sub>IDC-2</sub> are included, grouped by antibiotic selection sets. As expected, the ORF *bla*<sub>IDC-2</sub> is most common in the cefotaxime selection set, but also occurs in the ertapenem and ciprofloxacin selection sets, while it does not confer resistance to these two antibiotics. A plausible explanation is that a *bla*<sub>GES-5</sub> gene present on the same read provides resistance in all three appearances in the ertapenem selection set. The single read recovered from the ciprofloxacin selection set contains no factor which could explain the resistance phenotype. However, since the read is not complete (i.e. only one of the binding sites for the primers used to amplify the gene cassettes could be detected) another gene cassette might provide ciprofloxacin resistance. It is also conceivable that this clone was selected due to a chromosomal mutation conferring resistance to ciprofloxacin, for example in *gyrA*.

| Selection set    | Abundance of <i>bla</i> <sub>IDC-1</sub> | Abundance of <i>bla</i> <sub>IDC-2</sub> |
|------------------|------------------------------------------|------------------------------------------|
| cefotaxime       | 8                                        | 21                                       |
| chloramphenicol  | 0                                        | 0                                        |
| ciprofloxacin    | 0                                        | 1                                        |
| colistin         | 0                                        | 0                                        |
| ertapenem        | 0                                        | 3                                        |
| gentamicin       | 0                                        | 0                                        |
| imipenem         | 0                                        | 0                                        |
| meropenem        | 0                                        | 0                                        |
| rifampicin       | 0                                        | 0                                        |
| sulfamethoxazole | 0                                        | 0                                        |
| trimethoprim     | 0                                        | 0                                        |

**Table S2.** Occurrence of the newly discovered *bla*<sub>IDC</sub> family in 1251 metagenomic datasets. The number of paired-end Illumina short reads mapping to *bla*<sub>IDC-1</sub> with 95 % identity over the length of at least 20 amino acids are shown. Using this threshold, both *bla*<sub>IDC-1</sub> and *bla*<sub>IDC-2</sub> containing reads are recovered. Reads from selected metagenomic datasets (111, 109, 105 from MG-RAST project: MGP19878) were mapped to DNA sequences containing *ampC* and surrounding attachment sites. Paired-end reads covered *ampC* and the adjacent attachment site, unambiguously confirming that *ampC* is present as a gene cassette. See [1] for the list of all metagenomes investigated.

| Metagenome    | Raw count | Environment              | Country       | Latitude | Longitude | Reference |
|---------------|-----------|--------------------------|---------------|----------|-----------|-----------|
| 111           | 135       | Wastewater/sludge        | India         | 19.0760  | 72.8777   | [2]       |
| 109           | 56        | River sediment *         | India         | 18.5104  | 73.8399   | [3]       |
| 105           | 38        | River sediment *         | India         | 18.5431  | 73.8916   | [3]       |
| 104           | 37        | River sediment *         | India         | 18.5104  | 73.8399   | [3]       |
| 110           | 27        | River sediment *         | India         | 18.5431  | 73.8916   | [3]       |
| 103           | 17        | River sediment *         | India         | 18.4743  | 73.8091   | [3]       |
| ERR1713344    | 12        | Wastewater/sludge        | China         | 23.1114  | 113.352   | [4]       |
| JL32          | 10        | Industrially polluted ** | India         | 17.5407  | 78.2618   | [5]       |
| ERR1713407    | 9         | Wastewater/sludge        | Vietnam       | 10.8231  | 106.6297  | [4]       |
| ERR1713370    | 8         | Wastewater/sludge        | Cambodia      | 11.5449  | 104.8922  | [4]       |
| 108           | 5         | River sediment *         | India         | 18.4743  | 73.8091   | [3]       |
| SRR2107218    | 5         | Wastewater/sludge        | Argentina     | -34.07   | -59.07    | [6]       |
| ERR1713410    | 4         | Wastewater/sludge        | Zambia        | 15.3875  | 28.3228   | [4]       |
| ERR2592258    | 3         | Wastewater/sludge        | India         | 9.9715   | 76.3051   | [4]       |
| ERR1713345    | 2         | Wastewater/sludge        | Cote d'Ivoire | 5.3600   | -4.0083   | [4]       |
| ERR1713355    | 2         | Wastewater/sludge        | Ethiopia      | 8.9199   | 38.7556   | [4]       |
| ERR1713362    | 2         | Wastewater/sludge        | India         | 9.9312   | 76.2673   | [4]       |
| ERR1713367    | 2         | Wastewater/sludge        | Italy         | 41.8193  | 12.4281   | [4]       |
| ERR1713369    | 2         | Wastewater/sludge        | Kenya         | -1.2455  | 37.0161   | [4]       |
| ERR1713385    | 2         | Wastewater/sludge        | Peru          | -11.997  | -76.8368  | [4]       |
| ERR1713386    | 2         | Wastewater/sludge        | Senegal       | 14.7645  | -17.3660  | [4]       |
| ERR1725951    | 2         | Wastewater/sludge        | Brazil        | -1.4558  | -48.4902  | [4]       |
| ERR1725985    | 2         | Wastewater/sludge        | Kenya         | -1.2455  | 37.0161   | [4]       |
| ERR2592269    | 2         | Wastewater/sludge        | Singapore     | 1.3332   | 103.7561  | [4]       |
| ERR2592283    | 2         | Wastewater/sludge        | Zambia        | -12.8232 | 28.2176   | [4]       |
| SRR2107176    | 2         | Wastewater/sludge        | Argentina     | -34.07   | -59.07    | [4]       |
| ERR1470826    | 1         | Wastewater/sludge        | Denmark       | 55.6950  | 12.6150   | [4]       |
| ERR1713337    | 1         | Wastewater/sludge        | Brazil        | -1.4558  | -48.4902  | [4]       |
| ERR1713368    | 1         | Wastewater/sludge        | Kazakhstan    | 43.4039  | 76.8892   | [4]       |
| ERR1713384    | 1         | Wastewater/sludge        | Pakistan      | 24.8615  | 67.0099   | [4]       |
| ERR1713387    | 1         | Wastewater/sludge        | Singapore     | 1.3521   | 103.8198  | [4]       |
| ERR1713405    | 1         | Wastewater/sludge        | USA           | 39.8714  | -104.2701 | [4]       |
| ERR1726032    | 1         | Wastewater/sludge        | Zambia        | -12.8232 | 28.2176   | [4]       |
| ERR1726033    | 1         | Wastewater/sludge        | Zambia        | -12.8232 | 28.2176   | [4]       |
| ERR2592252    | 1         | Wastewater/sludge        | Cote d'Ivoire | 5.3600   | -4.0083   | [4]       |
| ERR2592255    | 1         | Wastewater/sludge        | Finland       | 60.2254  | 24.9940   | [4]       |
| ERR2592328    | 1         | Wastewater/sludge        | Australia     | -35.3452 | 149.0950  | [4]       |
| JL28          | 1         | Industrially polluted ** | India         | 17.5513  | 78.2331   | [5]       |
| Metagenomics2 | 1         | Industrially polluted ** | India         |          |           | [7]       |
| SRR2107219    | 1         | Wastewater/sludge        | Argentina     | -34.07   | -59.07    | [6]       |

\* River sediment, contaminated with municipal and hospital wastewater

\*\* River sediment, contaminated with wastewater from drug manufacture, including antibiotics

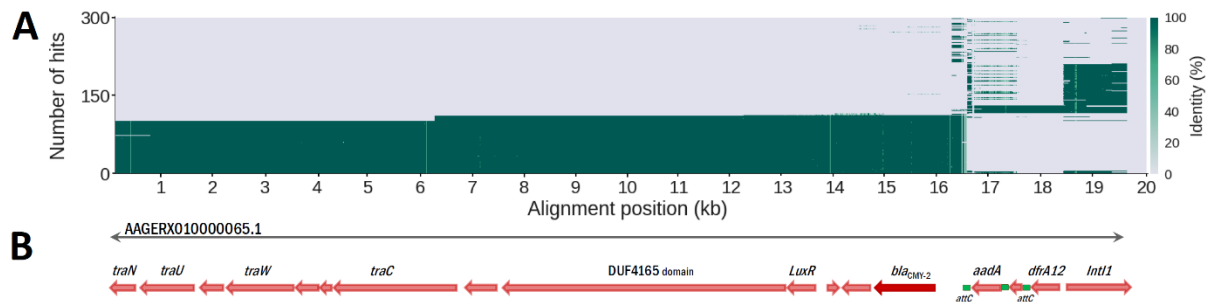

**Figure S1.** Context and alignment of *bla*<sub>CMY-2</sub> and an adjacent class 1 integron. **A:** Distribution of the conserved nucleotides across the reference sequence (AAGERX010000065.1). **B:** Annotation of the reference sequence consisting of the AmpC gene *bla*<sub>CMY-2</sub>, a class 1 integron with two resistance gene cassettes (*aadA*, *dfrA12*) upstream and the *tra* conjugal transfer genes downstream. BLASTN results of the entire nucleotide sequence AAGERX010000065.1 against the GenBank database using online NCBI BLAST+ tools are shown. The *bla*<sub>CMY-2</sub> gene is part of a 16.5 kb region occurring on many plasmids, which lack the integron in their immediate upstream sequence. The location of the *attC* sites shows that *bla*<sub>CMY-2</sub> is not a gene cassette, but is simply located adjacent to the last cassette of the integron.

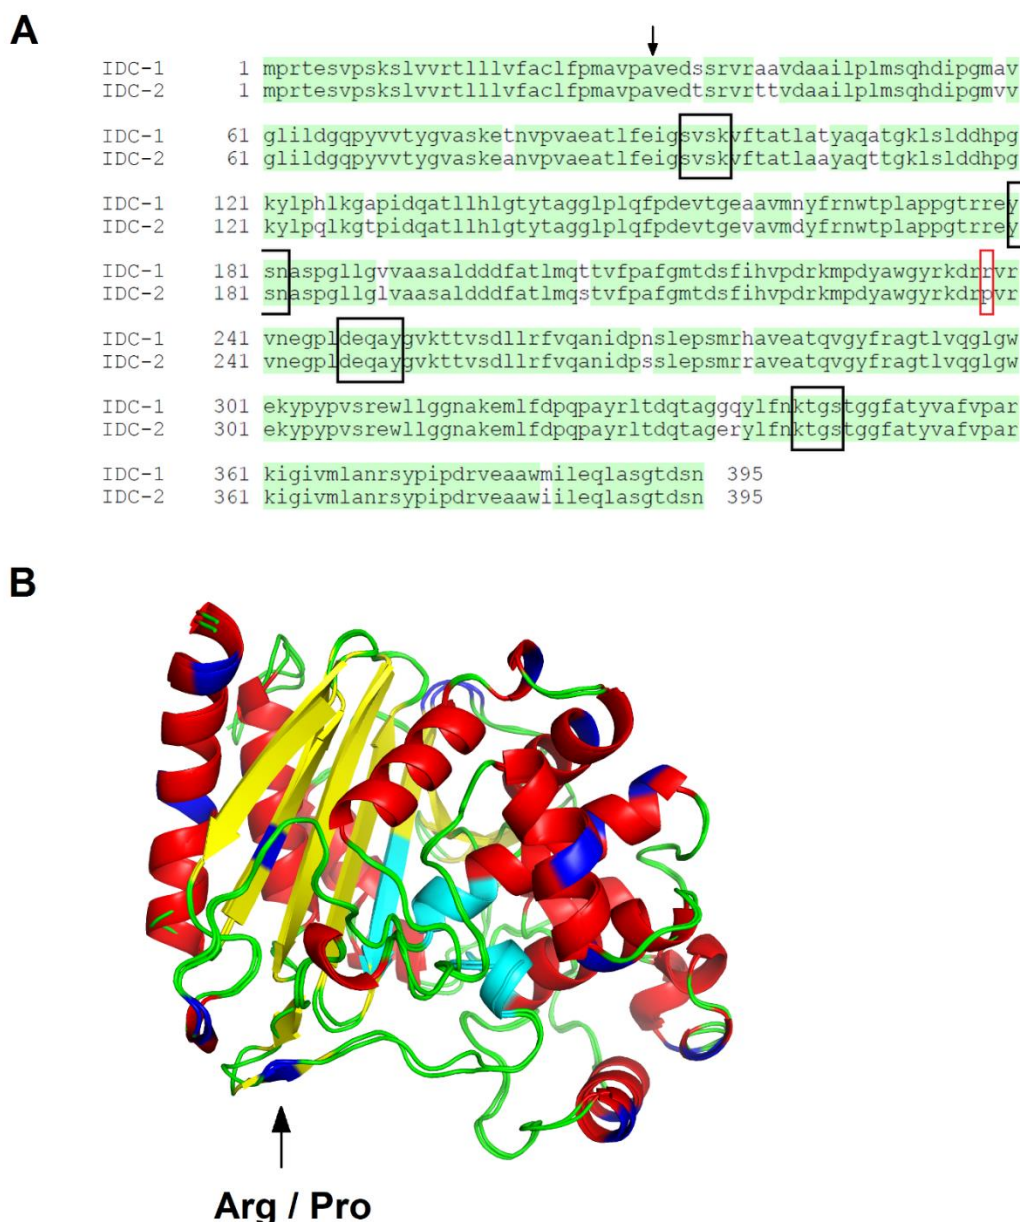

**Figure S2.** Amino acid sequence and comparison of the predicted protein structures of IDC-1 and IDC-2. While IDC-1 confers higher resistance than IDC-2, they have 95 % identity on amino acid level. One of the amino acid changes, Arg-238-Pro, is located close to the active site and might be responsible for the different level of  $\beta$ -lactamase activity. **A:** Alignment of IDC-1 and IDC-2 (precursor proteins). The four conserved sequence motifs are boxed in black [8,9]. Arg-238-Pro is boxed in red and the predicted signal peptide cleavage site for both proteins after position 31 is marked by an arrow. **B:** Overlay of the protein structure models IDC-1 and IDC-2 (mature proteins). Differences between the two AmpCs are highlighted in blue, the conserved active site in cyan.

## References

1. Böhm, M.-E.; Razavi, M.; Marathe, N.P.; Flach, C.-F.; Larsson, D.G.J. Discovery of a novel integron-borne aminoglycoside resistance gene present in clinical pathogens by screening environmental bacterial communities. *Microbiome* **2020**, *In press*.
2. Marathe, N.P.; Berglund, F.; Razavi, M.; Pal, C.; Dröge, J.; Samant, S.; Kristiansson, E.; Larsson, D.G.J. Sewage effluent from an Indian hospital harbors novel carbapenemases and integron-borne antibiotic resistance genes. *Microbiome* **2019**, *7*, 97, doi:10.1186/s40168-019-0710-x.
3. Marathe, N.P.; Pal, C.; Gaikwad, S.S.; Jonsson, V.; Kristiansson, E.; Larsson, D.G.J. Untreated urban waste contaminates Indian river sediments with resistance genes to last resort antibiotics. *Water Res.* **2017**, *124*, 388-397, doi:10.1016/j.watres.2017.07.060.
4. Hendriksen, R.S.; Munk, P.; Njage, P.; van Bunnik, B.; McNally, L.; Lukjancenko, O.; Röder, T.; Nieuwenhuijse, D.; Pedersen, S.K.; Kjeldgaard, J., et al. Global monitoring of antimicrobial resistance based on metagenomics analyses of urban sewage. *Nat Commun* **2019**, *10*, 1124, doi:10.1038/s41467-019-08853-3.
5. Kristiansson, E.; Fick, J.; Janzon, A.; Grabic, R.; Rutgersson, C.; Weijdegård, B.; Söderström, H.; Larsson, D.G.J. Pyrosequencing of antibiotic-contaminated river sediments reveals high levels of resistance and gene transfer elements. *PLoS ONE* **2011**, *6*, e17038, doi:10.1371/journal.pone.0017038.
6. Ibarbalz, F.M.; Orellana, E.; Figuerola, E.L.M.; Erijman, L. Shotgun Metagenomic Profiles Have a High Capacity To Discriminate Samples of Activated Sludge According to Wastewater Type. *Appl. Environ. Microbiol.* **2016**, *82*, 5186-5196, doi:10.1128/AEM.00916-16.
7. Pal, C.; Bengtsson-Palme, J.; Kristiansson, E.; Larsson, D.G.J. The structure and diversity of human, animal and environmental resistomes. *Microbiome* **2016**, *4*, 54, doi:10.1186/s40168-016-0199-5.
8. Feller, G.; Zekhnini, Z.; Lamotte-Brasseur, J.; Gerday, C. Enzymes from cold-adapted microorganisms. The class C  $\beta$ -lactamase from the antarctic psychrophile *Psychrobacter immobilis* A5. *Eur. J. Biochem.* **1997**, *244*, 186-191, doi:10.1111/j.1432-1033.1997.00186.x.
9. Pozzi, C.; Di Pisa, F.; De Luca, F.; Benvenuti, M.; Docquier, J.D.; Mangani, S. Atomic-Resolution Structure of a Class C  $\beta$ -Lactamase and Its Complex with Avibactam. *ChemMedChem* **2018**, *13*, 1437-1446, doi:10.1002/cmdc.201800213.
